# Supplementary material for: Diet’s Impact on Post-Traumatic Brain Injury Depression: Exploring Neurodegeneration, Chronic Blood–Brain Barrier Destruction, and Glutamate Neurotoxicity Mechanisms
Source: MDPI journal article supplement (doi:10.3390/nu15214681), 2023-11-04
Supplement: s1 [file s1]

| Study                           | Population  | Participant (n) |         | Odds Ratio | 95% CI       | Reference |
|---------------------------------|-------------|-----------------|---------|------------|--------------|-----------|
|                                 |             | TBI             | Control |            |              |           |
| Dean, et al. 2013               | US          | 36              | 36      | 0.23       | 0.09-0.52    | [4,78]    |
| Losoi, et al. 2016              | US          | 69              | 37      | 0.40       | 0.11-1.41    | [4,79]    |
| Amick, et al. 2018              | US          | 22662           | 26153   | 0.61       | 0.58-0.65    | [4,80]    |
| Bryant, et al. 2010             | Australia   | 321             | 321     | 0.67       | 0.45-0.99    | [4,81]    |
| Ponsford J, et al. 2019         | Australia   | 343             | 343     | 1.04       | 0.481-2.079  | [82]      |
| Pogoda, et al. 2012             | US          | 9998            | 3748    | 1.04       | 0.96-1.13    | [4,83]    |
| Dretsch, et al. 2015            | US          | 167             | 291     | 1.26       | 0.88-1.79    | [4,84]    |
| Waljas M, et al. 2015           | Europe      | 103             | 36      | 1.27       | 0.64-2.52    | [4,85]    |
| Leveille, et al. 2017           | Canada      | 22              | 28      | 1.32       | 0.48-3.67    | [4,86]    |
| Tremblay, et al. 2013           | Canada      | 15              | 15      | 1.32       | 0.36-4.82    | [4,87]    |
| Walker, et al. 2017             | US          | 176             | 40      | 1.35       | 0.72-2.53    | [4,88]    |
| LaFrance, et al. 2013           | US          | 41              | 51      | 1.35       | 0.06-1.19    | [4,89]    |
| Verfaellie, et al. 2014         | US          | 53              | 39      | 1.45       | 0.69-3.05    | [4,90]    |
| Vasterling, et al. 2000         | US          | 68              | 692     | 1.49       | 0.80-2.79    | [4,91]    |
| Nordhaug et al. 2018            | Europe      | 294             | 25662   | 1.49       | 0.20-1.85    | [4,92]    |
| Barnes, et al. 2012             | US          | 46              | 46      | 1.52       | 0.72-3.21    | [4,93]    |
| Palombo, et al. 2015            | US          | 50              | 25      | 1.57       | 0.56-4.43    | [4,94]    |
| Spira, et al. 2014              | US          | 98              | 305     | 1.62       | 1.07-2.44    | [4,95]    |
| Decq et al. 2016                | Europe      | 217             | 158     | 1.63       | 1.12-2.37    | [4,96]    |
| Mickevicene et al. 2002         | Europe      | 131             | 146     | 1.65       | 0.99-2.74    | [4,97]    |
| Jurick, et al. 2018             | US          | 42              | 28      | 1.65       | 0.70-3.91    | [4,98]    |
| MacGregor 2013                  | US          | 334             | 658     | 1.72       | 1.21-2.44    | [4,99]    |
| Polusny, et al. 2011            | US          | 60              | 748     | 1.90       | 1.18-3.04    | [4,100]   |
| Ozen, et al.2010                | Canada      | 43              | 44      | 1.97       | 0.92-4.24    | [4,101]   |
| Baldassre, et al. 2015          | US          | 188             | 210     | 2.03       | 1.30-3.19    | [4,102]   |
| Tarazi, et al. 2018             | Canada      | 45              | 25      | 2.03       | 0.83-5.01    | [4,103]   |
| Callahan, et al. 2018           | US          | 42              | 36      | 2.08       | 0.91-4.73    | [4,104]   |
| Lee, et al. 2015                | Canada      | 182             | 2843    | 2.10       | 1.56-2.81    | [4,105]   |
| Dismuke-Greer, et al. 2018      | US          | 300             | 56      | 2.12       | 1.13-3.96    | [4,106]   |
| Barker-Collo, et al. 2018       | New Zealand | 341             | 341     | 2.17       | 1.051-4.125  | [107]     |
| Vasterling, et al. 2012         | US          | 87              | 84      | 2.25       | 1.30-3.89    | [4,108]   |
| Gardner, et al. 2017            | Australia   | 16              | 16      | 2.29       | 0.64-8.20    | [4,109]   |
| Hoot, et al. 2018               | US          | 376             | 73      | 2.32       | 1.31-4.09    | [4,110]   |
| Gill, et al. 2018               | US          | 42              | 22      | 2.34       | 0.91-5.99    | [4,111]   |
| Donnelly, et al. 2018           | US          | 130             | 225     | 2.59       | 1.68-3.98    | [4,112]   |
| Lippa, et al. 2015              | US          | 99              | 156     | 2.64       | 1.52-4.57    | [4,113]   |
| Johansson et al. 2009           | Europe      | 46              | 40      | 2.66       | 0.1-67.62    | [4,114]   |
| Albrecht, Jennifer, et al. 2020 | US          | 78044           | 76107   | 2.81       | 2.725-2.906  | [115]     |
| Vanderploeg, et al. 2007        | US          | 254             | 3214    | 3.00       | 2.03-4.45    | [4,116]   |
| Olivera, et al. 2015            | US          | 70              | 28      | 3.10       | 1.39-6.91    | [4,117]   |
| Morissette, et al. 2011         | US          | 98              | 115     | 3.13       | 1.88-5.20    | [4,118]   |
| Bell, et al. 1999               | US          | 20              | 20      | 3.25       | 1.02-10.34   | [4,119]   |
| Rogers, et al. 2015             | Australia   | 10              | 10      | 3.29       | 0.63-17.05   | [4,120]   |
| Yvette Always, et al. 2012      | New Zealand | 43              | 43      | 3.52       | 0.494-14.738 | [121]     |
| Alice Theadom, et al. 2016      | New Zealand | 341             | 341     | 3.58       | 1.812-6.560  | [122]     |
| S Barker-Collo, et al. 2015     | New Zealand | 315             | 315     | 3.68       | 1.831-6.953  | [123]     |

|                                 |             |               |      |                |                      |                     |
|---------------------------------|-------------|---------------|------|----------------|----------------------|---------------------|
| Schoenhuber, et al. 1988        | Europe      | 35            | 35   | 3.63           | 1.5-8.78             | [4,124]             |
| Kerr, et al. 2018               | US          | 172           | 32   | 4.10           | 0.94-17.81           | [4,125]             |
| Carrier, et al. 2018            | Canada      | 43            | 40   | 4.10           | 1.80-9.33            | [126]               |
| Mac Donald, et al. 2017         | US          | 50            | 44   | 4.22           | 1.52-11.70           | [4,127]             |
| Hoge, et al. 2008               | US          | 368           | 1673 | 4.39           | 2.91-6.63            | [4,128]             |
| Gaines, et al. 2016             | US          | 57            | 57   | 4.39           | 2.17-8.90            | [4,129]             |
| A J Osborn, et al. 2017         | Australia   | 353           | 353  | 4.41           | 2.512-8.141          | [130]               |
| Biyao Wang, et al. 2021         | Europe      | 1683          | 1683 | 4.84           | 3.660-6.507          | [131]               |
| Mac Donald, et al. 2015         | US          | 38            | 34   | 4.95           | 0.99-24.71           | [4,132]             |
| Iverson, et al. 2015            | US          | 33            | 119  | 5.00           | 2.38-10.54           | [4,133]             |
| Kerr et al. 2012                | US          | 679           | 365  | 5.21           | 2.78-9.75            | [4,134]             |
| Graham, et al. 2013             | US          | 41            | 26   | 5.26           | 2.05-13.47           | [4,135]             |
| Wilk, et al. 2012               | US          | 260           | 846  | 5.42           | 3.39-8.67            | [4,136]             |
| Murray B. Stein, et al. 2019    | US          | 1155          | 1155 | 5.45           | 4.036-7.465          | [137]               |
| Didehbani, et al. 2013          | US          | 30            | 29   | 5.75           | 1.43-23.14           | [4,138]             |
| Ashley Di Battista, et al. 2014 | New Zealand | 20            | 20   | 5.79           | 0.481-46.91          | [139]               |
| Strigo, et al. 2018             | US          | 20            | 24   | 5.81           | 1.83-18.47           | [4,140]             |
| Petrie, et al. 2014             | US          | 34            | 17   | 5.93           | 1.17-30.17           | [4,141]             |
| Bomyea, et al. 2016             | US          | 52            | 32   | 6.11           | 2.58-14.47           | [4,142]             |
| Baker, et al. 2018              | US          | 21            | 21   | 6.23           | 0.67-58.23           | [4,143]             |
| Coughlin, et al. 2017           | US          | 14            | 16   | 6.62           | 0.29-149.36          | [4,144]             |
| Epstein, et al. 2016            | US          | 55            | 27   | 7.46           | 3.03-18.39           | [4,145]             |
| Konrad et al. 2011              | Europe      | 33            | 33   | 7.69           | 0.38-154.38          | [4,146]             |
| Schiehser, et al. 2017          | US          | 60            | 40   | 8.67           | 3.88-19.37           | [4,147]             |
| Whelan-Goodinson, et al. 2009   | New Zealand | 100           | 100  | 9.14           | 2.820 -25.22         | [148]               |
| Peskind, et al. 2011            | US          | 12            | 12   | 9.21           | 0.42-199.77          | [4,149]             |
| Drapeau, et al. 2017            | Canada      | 20            | 11   | 9.39           | 2.16-40.85           | [4,150]             |
| Dean P McKenzie, et al. 2018    | New Zealand | 138           | 138  | 9.53           | 3.698-25.681         | [151]               |
| Jane Dahm 2013                  | New Zealand | 123           | 123  | 10.79          | 3.681-25.904         | [152]               |
| Dailey, et al. 2018             | US          | 15            | 14   | 10.80          | 2.44-47.92           | [4,153]             |
| Guskiewicz, et al. 2007         | US          | 1513          | 1039 | 11.25          | 6.89-18.36           | [4,154]             |
| Astafiev, et al. 2016           | US          | 20            | 22   | 12.30          | 0.63-242.05          | [4,155]             |
| Chong 2018                      | US          | 33            | 33   | 13.60          | 4.91-37.68           | [4,156]             |
| Raikes, et al. 2018             | US          | 5             | 18   | 14.01          | 1.83-107.59          | [4,157]             |
| Pineau, et al. 2015             | Canada      | 25            | 25   | 15.33          | 4.73-49.70           | [4,158]             |
| Newberg, et al. 2014            | US          | 25            | 10   | 16.61          | 0.88-314.17          | [4,159]             |
| Donnell, et al. 2012            | US          | 154           | 3001 | 17.12          | 10.90-26.86          | [4,160]             |
| Sponheim, et al. 2011           | US          | 9             | 8    | 18.73          | 2.39-146.64          | [4,161]             |
| Maruta et al. 2016              | US          | 33            | 140  | 27.11          | 11.90-71.26          | [4,162]             |
| Morey et al. 2013               | US          | 30            | 70   | 38.09          | 14.02-103.50         | [4,163]             |
| Himanen et al. 2009             | Europe      | 17            | 31   | 70.11          | 3.71-1326            | [4,164]             |
| Suhr and Gunstad, et al. 2002   | US          | 63            | 50   | 104.6          | 6.22-1758.73         | [4,165]             |
| Walker et al. 2013              | US          | 29            | 58   | 372.4          | 96.32-1440           | [4,166]             |
| Small et al. 2013               | US          | 5             | 5    | 512.9          | 10.58-24853          | [4,167]             |
| Raskin, et al. 1997             | US          | 10            | 10   | 6701           | 197-228190           | [4,168]             |
| <b>Total</b>                    |             | <b>279772</b> |      | <b>2.74237</b> | <b>2.671 - 2.815</b> | <b>p &lt; 0.001</b> |

**Supplement S1. Prevalence of post-TBI depression in Europe, the United States, Canada, Australia, and New Zealand ver. of control group or indigenous population**  
(<https://ourworldindata.org/mental-health>).

|               | Event (depression) | No Event |
|---------------|--------------------|----------|
| TBI group     | a                  | b        |
| Control group | c                  | d        |

We calculated the confidence interval and the odds ratio using the following formulas.

- **Odds ratio** =  $(a*d) / (b*c)$
- **Lower 95% CI** =  $e^{\ln(OR) - 1.96\sqrt{(1/a + 1/b + 1/c + 1/d)}}$
- **Upper 95% CI** =  $e^{\ln(OR) + 1.96\sqrt{(1/a + 1/b + 1/c + 1/d)}}$

Whereas in the publication the data were presented as a percentage of the number of cases, we recalculated and presented the data as an odds ratio.

In the case of publication with only a TBI group without a control group, we used a control group with the same number of cases for that population, and data on the prevalence of depression in that population were taken from <https://ourworldindata.org/mental-health> for the same time period, a similar method was done in a meta-analysis where a control group with the same number of patients was taken from the National Health Insurance Service-National Health Information Database (NHIS-NHID) in South Korea [169].

Odds ratio was calculated as previously described [170-173].
