# Supplementary material for: Diet’s Impact on Post-Traumatic Brain Injury Depression: Exploring Neurodegeneration, Chronic Blood–Brain Barrier Destruction, and Glutamate Neurotoxicity Mechanisms
Source: MDPI journal article supplement (doi:10.3390/nu15214681), 2023-11-04
Supplement: s1 [file s1]

| Study                               | Population | Participant (n) |         | Odds Ratio | 95% CI       | Reference |
|-------------------------------------|------------|-----------------|---------|------------|--------------|-----------|
|                                     |            | TBI             | Control |            |              |           |
| Li, Gangqin, et al. 2022            | China      | 72              | 72      | 41.36      | 9.42-181.72  | [174]     |
| Tomar, Sachin, et al. 2018          | India      | 100             | 100     | 126        | 40.54-391.66 | [175]     |
| Ansari, Ahmed, et al. 2014          | India      | 250             | 250     | 14.8       | 7.25-30.23   | [176]     |
| Jain, Akhilesh, et al. 2014         | India      | 204             | 204     | 11.98      | 5.58-25.75   | [177]     |
| Devi, Yashodha, et al. 2020         | India      | 50              | 50      | 7.58       | 1.6-35.93    | [178]     |
| Chaurasiya, Akanksha, et al. 2021-a | India      | 39              | 39      | 21.28      | 2.63-172.15  | [179]     |
| Chaurasiya, Akanksha, et al. 2021-b | India      | 39              | 39      | 14.93      | 1.82-122.46  | [180]     |
| Ubukata, Shiho, et al. 2022         | Japan      | 88              | 88      | 83.13      | 19.12-361.42 | [181]     |
| Jang, Sung Ho, et al. 2020          | Korea      | 58              | 58      | 51         | 6.54-397.97  | [182]     |
| Choi, Yoonjeong, et al. 2022        | Korea      | 1141593         | 1141593 | 1.7        | 1.69-1.71    | [169]     |
| Looi, Mun Choon, et al. 2023        | Malaysia   | 309             | 309     | 9.24       | 4.93-17.33   | [183]     |
| Al-Kader, Dania A., et al. 2022     | Pakistan   | 31              | 31      | 4.16       | 1.39-12.5    | [184]     |
| Lin, Mau-Roung, et al. 2010         | Taiwan     | 146             | 146     | 24.24      | 8.51-69.08   | [185]     |
| Total                               |            | 2285938         |         | 2.704      | 1.692-1.715  | p < 0.001 |

**Supplement S2. Prevalence of post-TBI depression in Asian countries versus control group or indigenous population.** (<https://ourworldindata.org/mental-health>).

|               | Event (depression) | No Event |
|---------------|--------------------|----------|
| TBI group     | a                  | b        |
| Control group | c                  | d        |

We calculated the confidence Interval and the odds ratio using the following formulas.

- **Odds ratio** =  $(a*d) / (b*c)$
- **Lower 95% CI** =  $e^{\ln(OR) - 1.96\sqrt{(1/a + 1/b + 1/c + 1/d)}}$
- **Upper 95% CI** =  $e^{\ln(OR) + 1.96\sqrt{(1/a + 1/b + 1/c + 1/d)}}$

Whereas in the publication the data were presented as a percentage of the number of cases, we recalculated and presented the data as an odds ratio.

In the case of publication with only a TBI group without a control group, we used a control group with the same number of cases for that population, and data on the prevalence of depression in that population were taken from <https://ourworldindata.org/mental-health> for the same time period, a similar method was done in a meta-analysis where a control group with the same number of patients was taken from the National Health Insurance Service-National Health Information Database (NHIS-NHID) in South Korea [169].

Odds ratio was calculated as previously described [170-173].
